# Supplementary figures and images for: Morphogen-based simulation model of ray growth and joint patterning during fin development and regeneration
Source: Oxford University Press journal article supplement (doi:10.1242/dev.073452), 2012-02-09

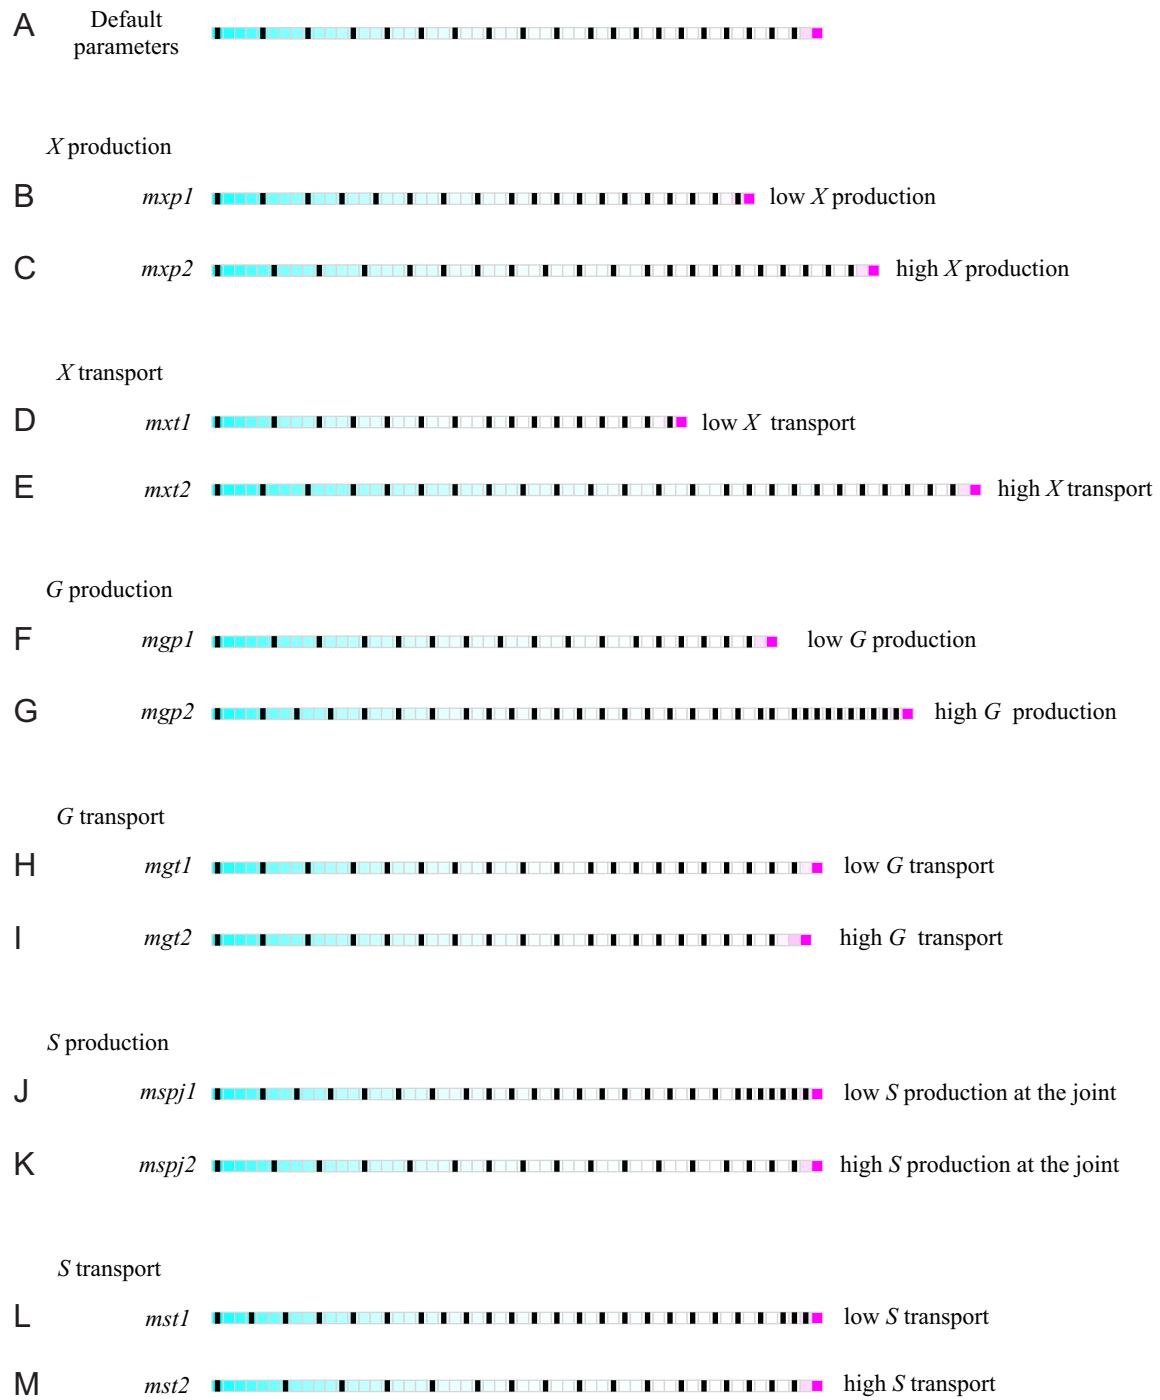

Supplement: dev073452figs4.pdf [file dev073452figs4.pdf]
